# Supplementary material for: A comprehensive physical interaction map between the Turnip mosaic potyvirus and Arabidopsis thaliana proteomes
Source: Research Square preprint supplement (doi:10.21203/rs.3.rs-149993/v2), 2021-05-20
Supplement: Supplementary file 1 [file 67bc24b1f17b345906fb0fcd.pdf]

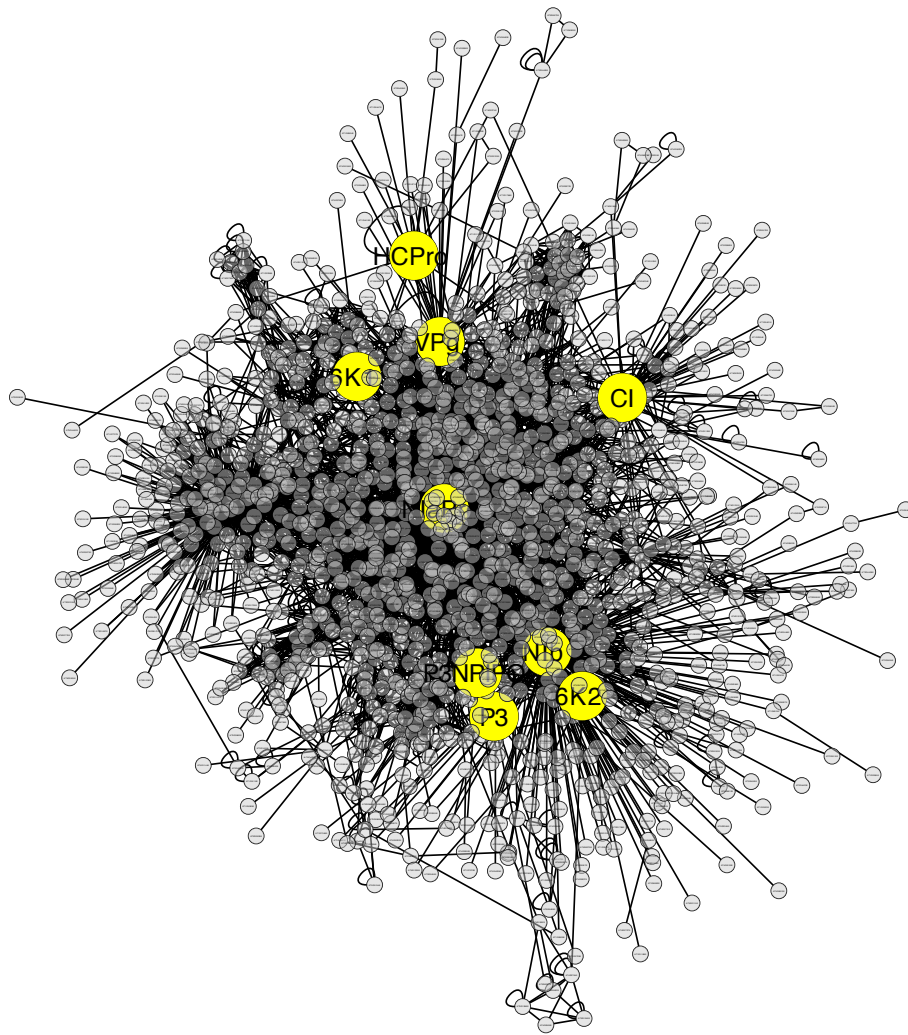

**Figure S1: Network of the virus-host interaction when the neighbors of the host proteins targeted by the virus are included.** This network includes virus-virus, virus-host, and host-host protein-protein interactions. The different viral proteins are highlighted in yellow.
